# Supplementary material for: Computational models of O-LM cells are recruited by low or high theta frequency inputs depending on h-channel distributions
Source: eLife journal article supplement (doi:10.7554/elife.22962), 2017-03-20

**A****Somatic H models**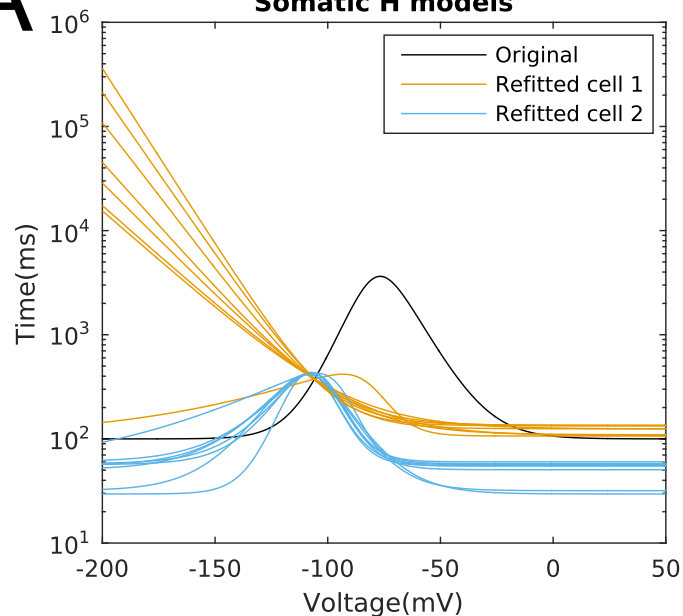**Somatodendritic H models**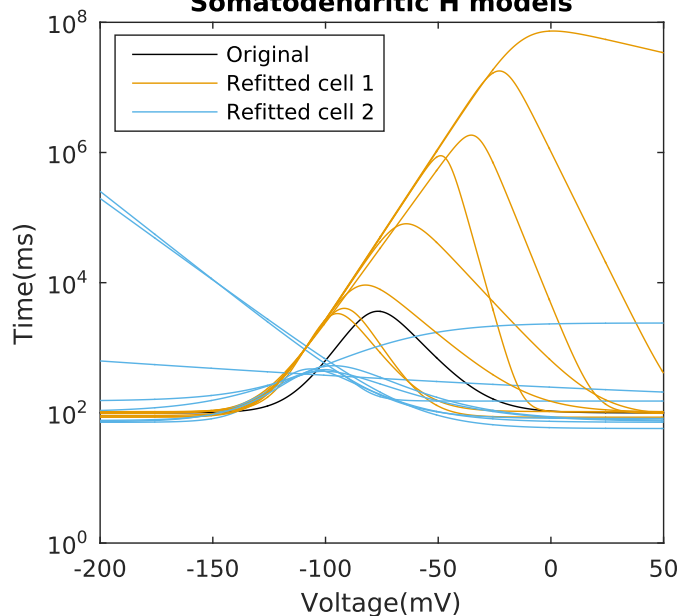**B****Rank 326,  $H_S$ , cell 1**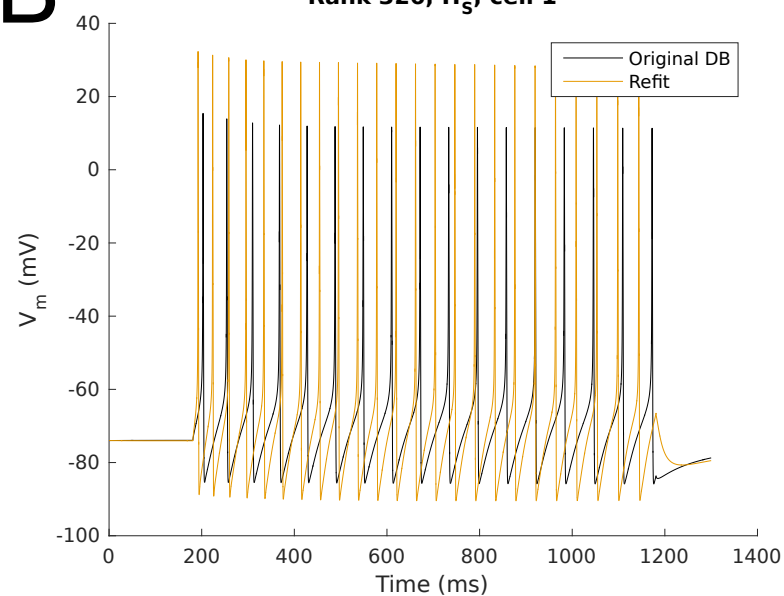**Rank 356,  $H_{SD}$ , cell 1**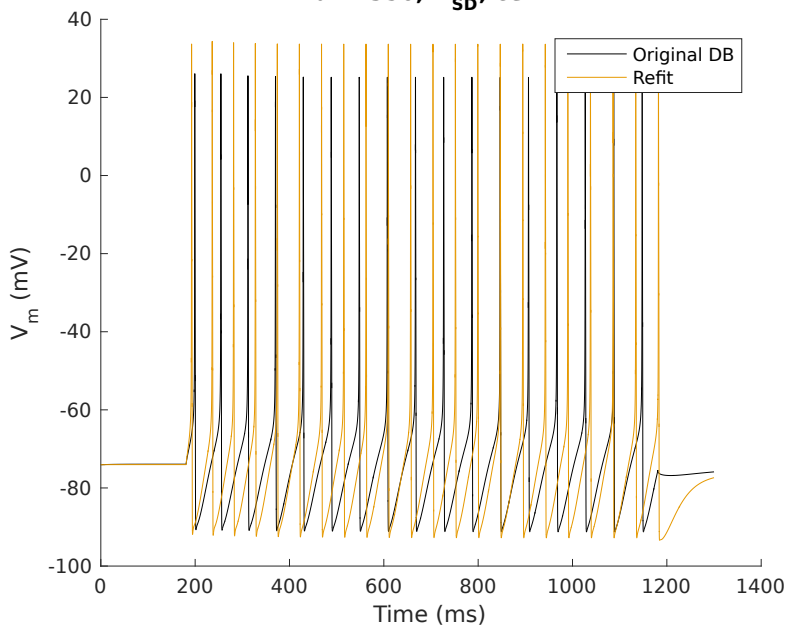**Rank 26,  $H_S$ , cell 2**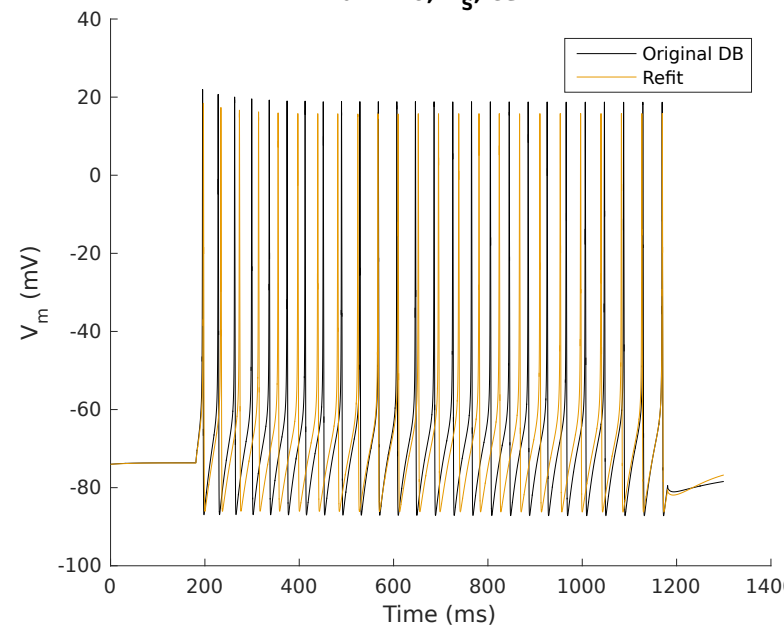**Rank 6,  $H_{SD}$ , cell 2**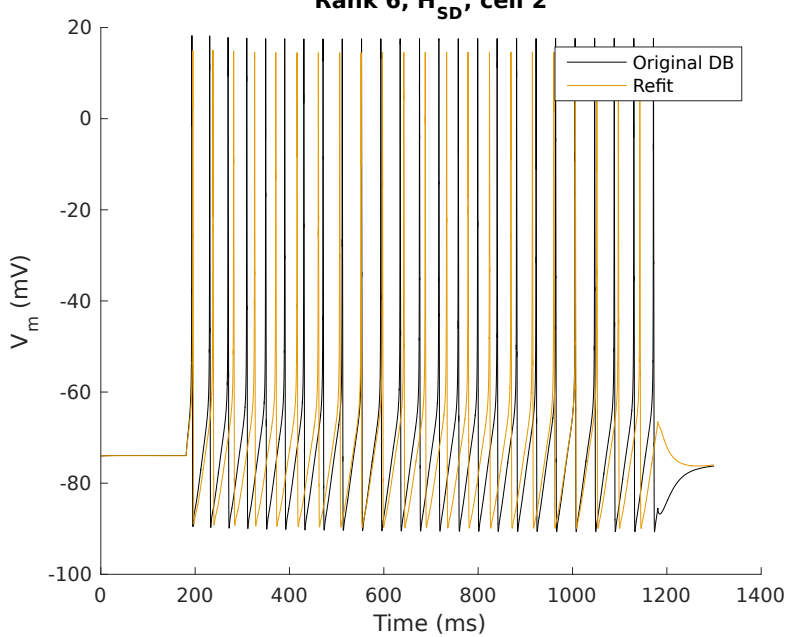

Supplement: supp [file elife-22962-supp-v1.zip]
