# Supplementary material for: Computational models of O-LM cells are recruited by low or high theta frequency inputs depending on h-channel distributions
Source: eLife journal article supplement (doi:10.7554/elife.22962), 2017-03-20
Supplement: supp [file elife-22962-supp-v1.zip]

Figure 3 displays three line graphs showing electrophysiological properties of  $H_s$ ,  $H_s'$ , and  $H_s''$  neurons under various conditions. The y-axis for all graphs represents a specific property, and the x-axis lists the conditions:  $H_s$ ,  $H_s'$ ,  $H_s''$ ,  $H_{sp}$ ,  $H_{sp}'$ ,  $H_{sp}''$ , and  $H_{sp}'-H_{sp}''-Kdrrs$ .

**Mean  $V_m$  (mV):** The y-axis ranges from -74 to -62 mV. Statistical significance is indicated by asterisks (\*, \*\*\*) and brackets.  $H_s$  and  $H_s'$  show no significant difference (n.s.) between  $H_s$  and  $H_s'$ , and  $H_s$  and  $H_s''$ .  $H_s'$  and  $H_s''$  show a significant difference (\*).  $H_{sp}$  and  $H_{sp}'$  show no significant difference (n.s.), while  $H_{sp}$  and  $H_{sp}''$  show a significant difference (\*\*\*).  $H_{sp}'$  and  $H_{sp}''$  show a significant difference (\*\*\*).

**STD  $V_m$  (mV):** The y-axis ranges from 1 to 3.5 mV. Statistical significance is indicated by asterisks (\*, \*\*, \*\*\*) and brackets.  $H_s$  and  $H_s'$  show a significant difference (\*).  $H_s'$  and  $H_s''$  show a significant difference (\*\*).  $H_s$  and  $H_s''$  show no significant difference (n.s.).  $H_{sp}$  and  $H_{sp}'$  show a significant difference (\*\*\*).  $H_{sp}$  and  $H_{sp}''$  show a significant difference (\*\*\*).  $H_{sp}'$  and  $H_{sp}''$  show a significant difference (\*\*\*).

**Spike rate (Hz):** The y-axis ranges from 2 to 3.2 Hz. Statistical significance is indicated by asterisks (\*) and brackets.  $H_s$  and  $H_s'$  show a significant difference (\*).  $H_s'$  and  $H_s''$  show no significant difference (n.s.).  $H_s$  and  $H_s''$  show no significant difference (n.s.).  $H_{sp}$  and  $H_{sp}'$  show no significant difference (n.s.).  $H_{sp}$  and  $H_{sp}''$  show no significant difference (n.s.).  $H_{sp}'$  and  $H_{sp}''$  show no significant difference (n.s.).

[illegible]
