# Supplementary figures and images for: Computational models of O-LM cells are recruited by low or high theta frequency inputs depending on h-channel distributions
Source: eLife journal article supplement (doi:10.7554/elife.22962), 2017-03-20

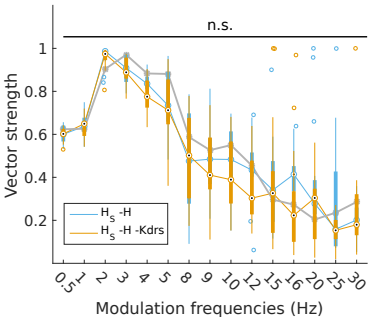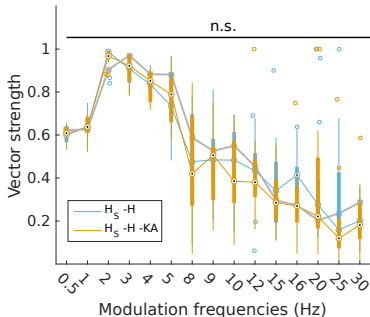

Supplement: supp [file elife-22962-supp-v1.zip]

A

Rank 96, Spike rate

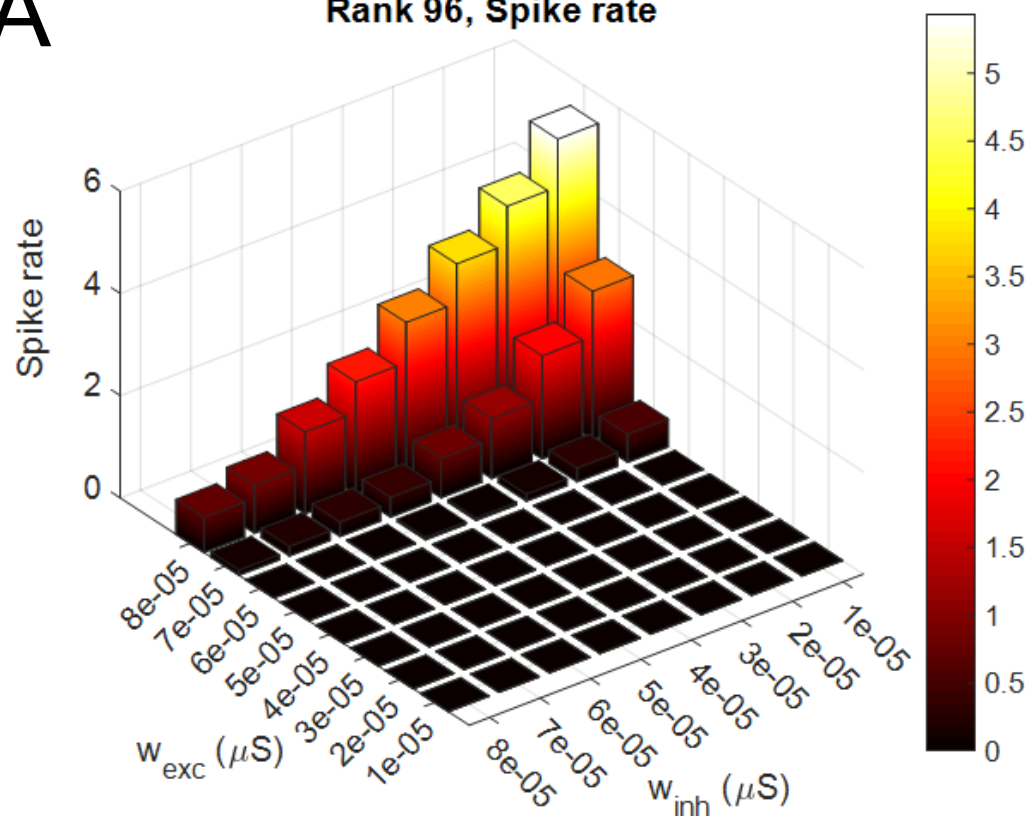

Rank 326, Spike rate

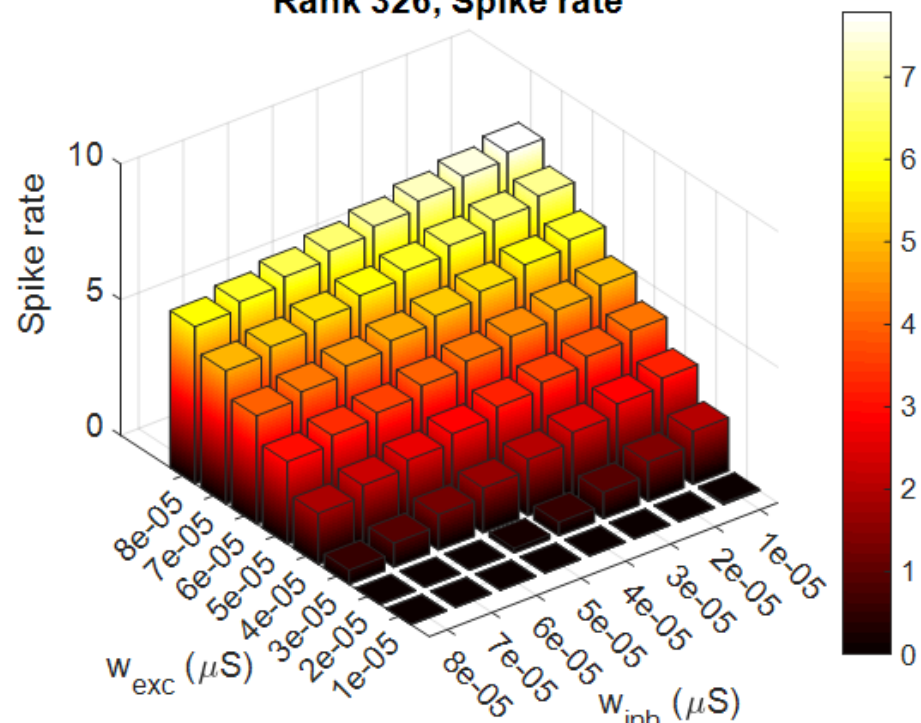

B

Somatic inputs

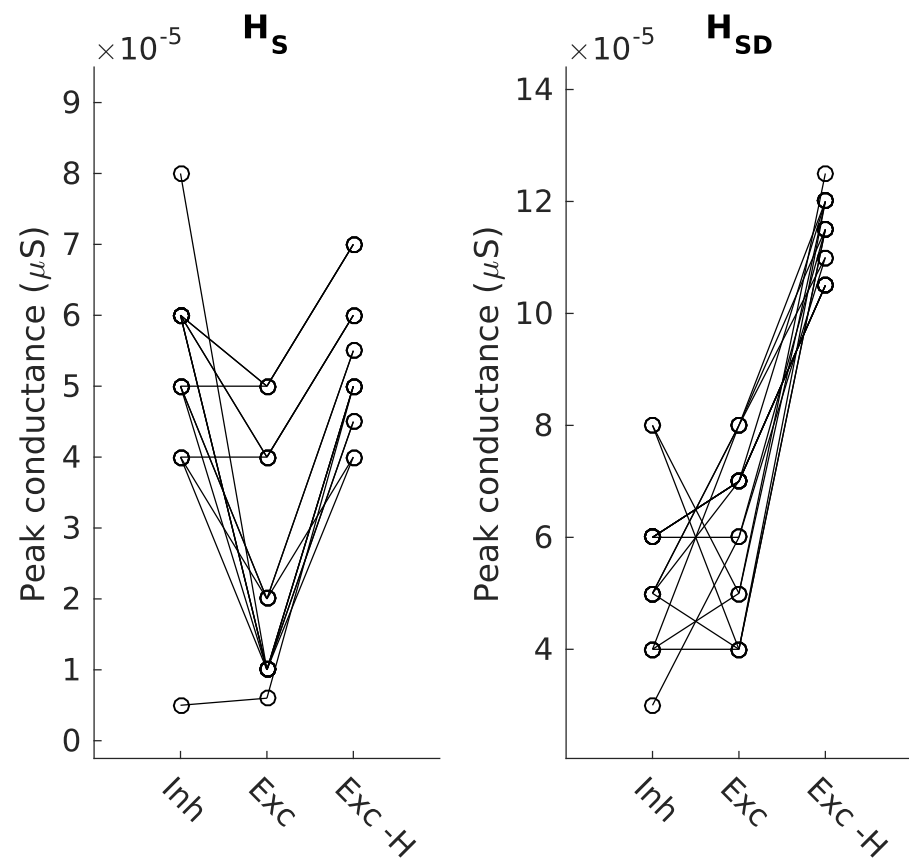

C

Somatodendritic inputs

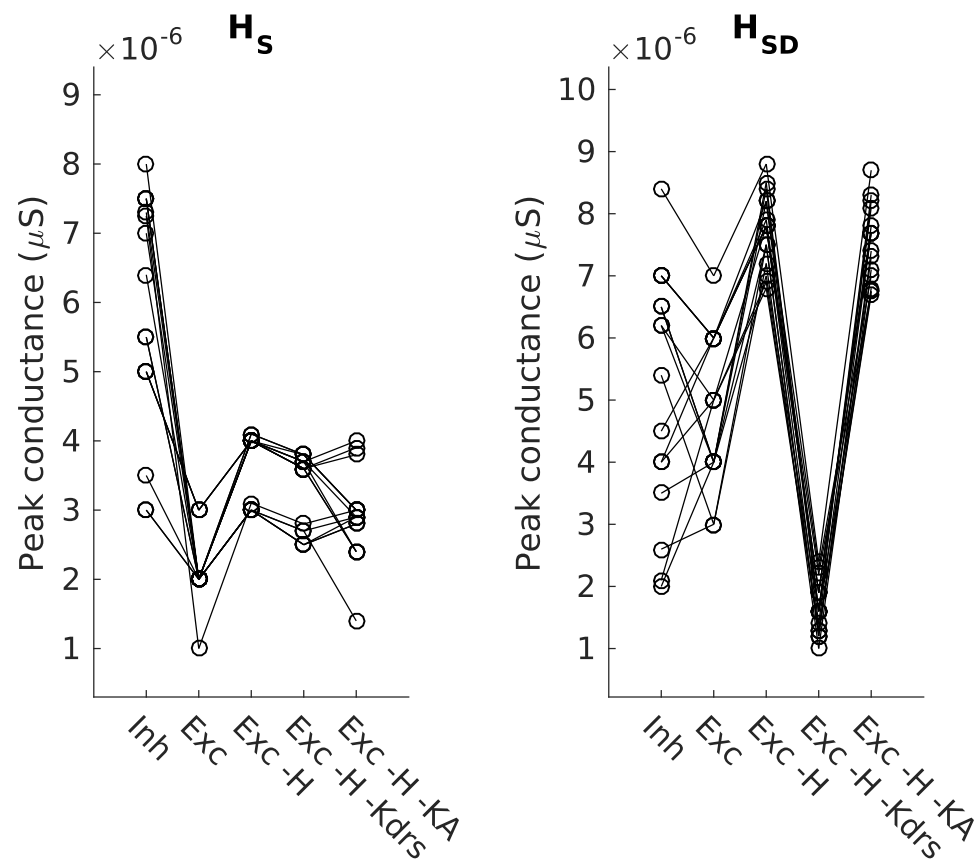

Supplement: supp [file elife-22962-supp-v1.zip]

**A**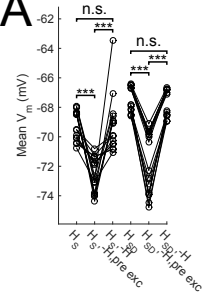**B**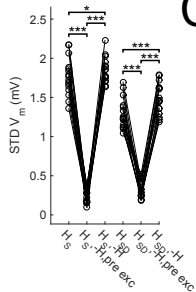**C**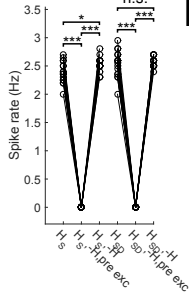**D**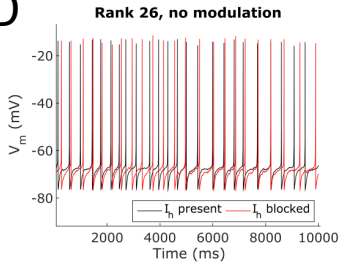

Supplement: supp [file elife-22962-supp-v1.zip]

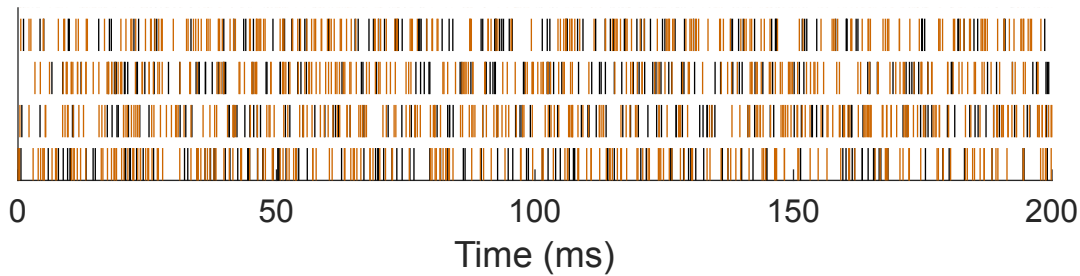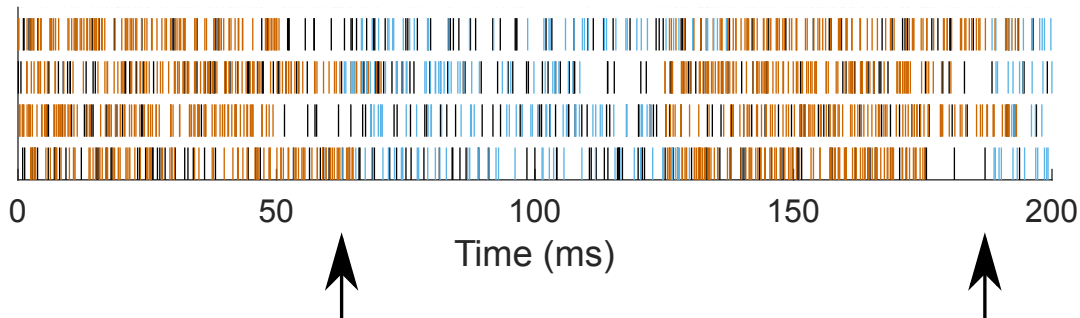

Supplement: supp [file elife-22962-supp-v1.zip]

**A****Somatic  $H_{leak}$  models**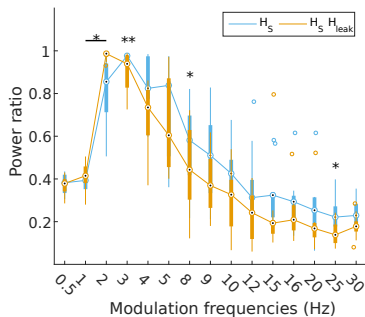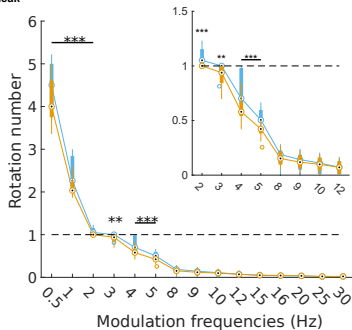**B****Somatodendritic  $H_{leak}$  models**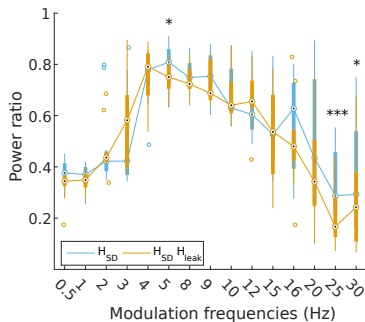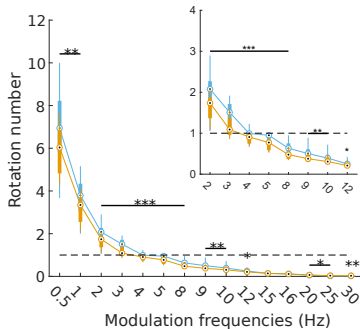

Supplement: supp [file elife-22962-supp-v1.zip]
